# Supplementary material for: Phosphorylation of SARS-CoV-2 Orf9b Regulates Its Targeting to Two Binding Sites in TOM70 and Recruitment of Hsp90
Source: MDPI journal article supplement (doi:10.3390/ijms22179233), 2021-08-26
Supplement: s1 [file s1]

## Supplementary Material

### Brandherm et al.

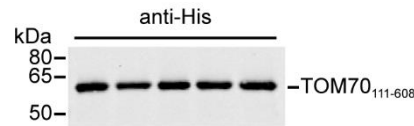

**Figure S1:** Labeling of TOM70<sub>111-608</sub> after elution from Ni-NTA beads. In five parallel samples, Ni-NTA beads containing 250 pmol TOM70<sub>111-608</sub> were washed three times with assay buffer containing 1 % (w/v) BSA and subsequently incubated with assay buffer for 40 min at 30 °C under constant shaking (750 rpm). The samples were cooled on ice, washed, and bound TOM70<sub>111-608</sub> was eluted and precipitated as described in Materials and Methods (Binding Assay). From each sample, 20 % were analyzed by SDS-PAGE, western blotting and immunolabelling, using an antibody directed against the N-terminal His tag of TOM70<sub>111-608</sub>.

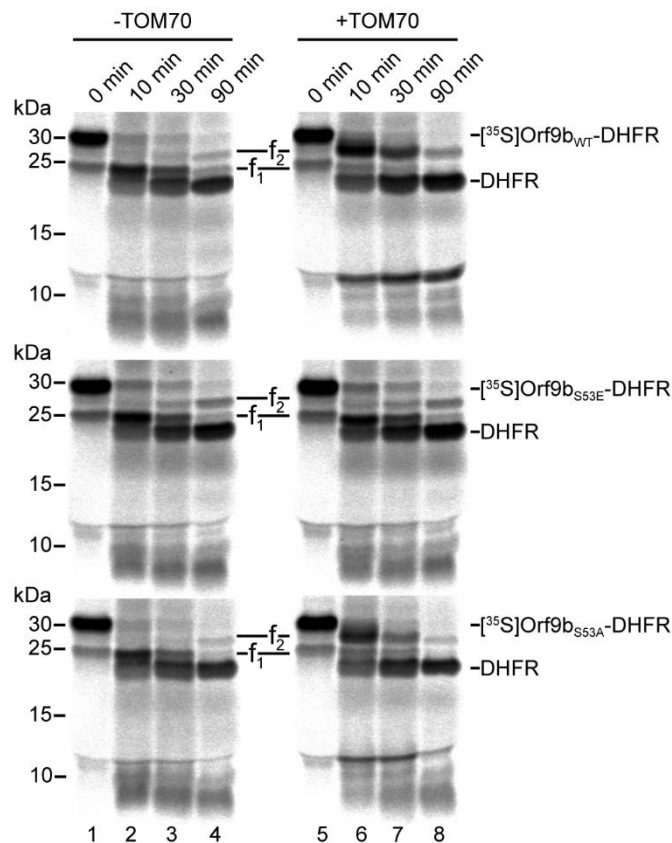

**Figure S2:** Degradation by trypsin of [<sup>35</sup>S]Orf9b-DHFR fusion proteins in the absence or presence of isolated TOM70<sub>111-608</sub>. The protein [<sup>35</sup>S]Orf9b<sub>WT</sub>-DHFR, [<sup>35</sup>S]Orf9b<sub>S53E</sub>-DHFR and [<sup>35</sup>S]Orf9b<sub>S53A</sub>-DHFR were synthesized in reticulocyte lysate and subsequently incubated with purified TOM70 (final concentration 0.1 mg/ml) for 10 min at 25 °C. Following addition of trypsin (5 µg/ml), the samples were incubated for 0, 10, 30, and 90 min on ice. Proteolysis was stopped by incubation for 5 min at 95 °C and degradation products were analyzed by SDS-PAGE. Radiolabeled proteins were visualized using a Bas1800 II phosphorimager (Fujifilm Europe GmbH, Düsseldorf, Germany) and the program Aida Image Analyzer V 4.19. Prominent degradation products are indicated as f1 (fragment 1) or f2 (fragment 2).

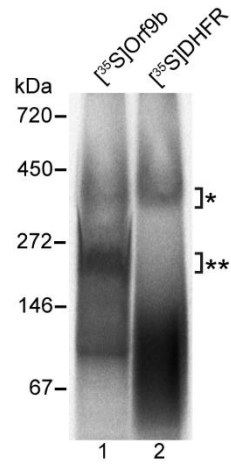

**Figure S3:** Analysis of reticulocyte lysates containing radiolabeled [ $^{35}\text{S}$ ]Orf9b and [ $^{35}\text{S}$ ]DHFR by blue native polyacrylamide gel electrophoresis (BN-PAGE). After translation of [ $^{35}\text{S}$ ]Orf9b and [ $^{35}\text{S}$ ]DHFR in reticulocyte lysate and removal of aggregates by centrifugation (1 h, 20,000  $\times$  g, 4  $^{\circ}\text{C}$ ), 3  $\mu\text{l}$  of each lysate were diluted and adjusted to a final volume of 40  $\mu\text{l}$ . [ $^{35}\text{S}$ ]Orf9b and [ $^{35}\text{S}$ ]DHFR samples were subjected to analysis by BN-PAGE. The gel was dried and radiolabeled proteins were detected autoradiographically. Asterisks: \* non-specific protein complex of the reticulocyte lysate; \*\* protein complex of Orf9b [21, 22].
